# Supplementary material for: Prevalence of cranial MRI findings in girls with central precocious puberty: a systematic review and meta-analysis
Source: publisher site journal article supplement (doi:10.1515/jpem-2018-0052), 2018-06-14
Supplement: Supplementary file 1 [file Orsdemir_Appendix 1.pdf › Orsdemir_Appendix 1.pdf]

## **Appendix 1: Search Strategy**

### **PubMed**

Title/abstract/full text/keywords/caption text/subject headings.

("precocious puberty" OR "early puberty" OR "Puberty, Precocious"[MeSH]) AND ("Magnetic Resonance Imaging"[MeSH] OR "magnetic resonance imaging" OR MRI OR imaging OR neuroimaging OR "work up")

1990-2015

No language limit

636 citations

### **Cochrane**

Title/abstract/full text/keywords/caption text/subject headings.

("early puberty" OR "precocious puberty") AND ("magnetic resonance imaging" OR MRI OR imaging OR neuroimaging OR work-up OR diagnosis)

1990-2015

No language limit

24 citations

### **Web of Science**

Title/abstract/keywords

("early puberty" OR "precocious puberty") AND ("magnetic resonance imaging" OR MRI OR imaging OR neuroimaging OR work-up)

1990-2015

No language limit

784 citations

### **Scopus**

Title/abstract/keywords

("early puberty" OR "precocious puberty") AND ("magnetic resonance imaging" OR MRI OR imaging OR neuroimaging OR work-up)

1990-2015

No language limit

789 citations

**ProQuest**

All fields except full text.

("early puberty" OR "precocious puberty") AND ("magnetic resonance imaging" OR MRI OR imaging OR neuroimaging OR work-up)

1990-2015

No language limit

584 citations

**Dissertation&Thesis**

All fields except full text

all("magnetic resonance imaging" OR MRI OR imaging OR neuroimaging OR work-up) AND all("early puberty" OR "precocious puberty")

1990-2015

No language limit

1 citation
