# Supplementary figures and images for: Prevalence of cranial MRI findings in girls with central precocious puberty: a systematic review and meta-analysis
Source: publisher site journal article supplement (doi:10.1515/jpem-2018-0052), 2018-06-14

Appendix 3: Funnel plot of the proportion of girls < 8 with positive MRI findings

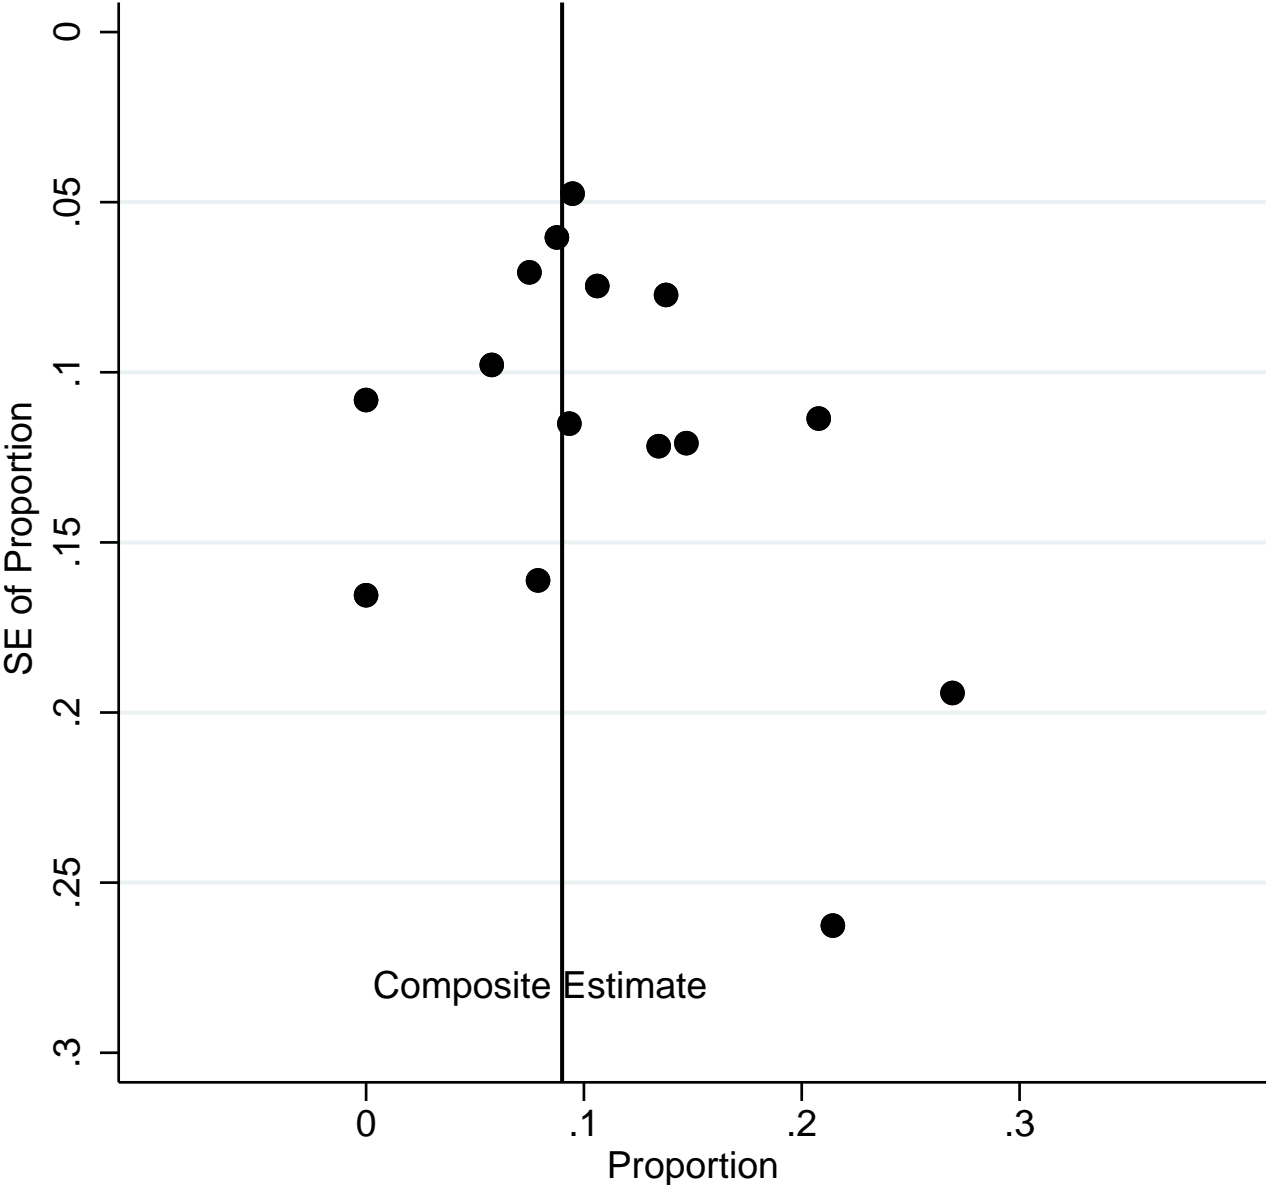

Supplement: Supplementary file 3 [file Orsdemir_Appendix 3.pdf › Orsdemir_Appendix 3.pdf]
